# Supplementary material
Source: Elsevier journal article supplement (https://www.sciencedirect.com/science/article/pii/S0925772108001235)
Supplement: 1-s2.0-S0925772108001235-main.pdf [file 1-s2.0-S0925772108001235-main.pdf]

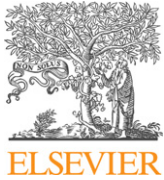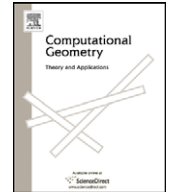

# Shortest descending paths through given faces

Mustaq Ahmed\*, Anna Lubiw

David R. Cheriton School of Computer Science, University of Waterloo, Waterloo, ON, N2L 3G1, Canada

## ARTICLE INFO

### Article history:

Received 11 December 2006

Received in revised form 17 October 2007

Accepted 17 October 2007

Available online 24 December 2008

Communicated by H. Meijer and

D. Rappaport

### Keywords:

Shortest descending paths

Shortest paths

Terrain

Convex optimization

## ABSTRACT

A path from  $s$  to  $t$  on a polyhedral terrain is *descending* if the height of a point  $p$  never increases while we move  $p$  along the path from  $s$  to  $t$ . No efficient algorithm is known to find a shortest descending path from  $s$  to  $t$  in a polyhedral terrain. We give some properties of such paths. In the case where the face sequence is specified, we show that the shortest descending path is unique, and use convex optimization to give an  $\epsilon$ -approximation algorithm that computes the path in  $O(n^{3.5} \log(\frac{1}{\epsilon}))$  time.

© 2008 Elsevier B.V. All rights reserved.

## 1. Introduction

The problem of determining a shortest path in a polyhedral terrain has many applications in robotics, industrial automation, Geographic Information Systems and wire routing. In certain applications, the feasibility of a path is determined by the height of the points. For example, for laying a canal of minimum length from the source of water at the top of a mountain to fields for irrigation purpose [11], and for skiing down a mountain along a shortest route, we need to compute a shortest path whose height never increases as we move from source to destination. The problem of finding *descending paths in a polyhedral terrain* was first studied by de Berg and van Kreveld [4], who gave an  $O(n \log n)$  time algorithm to decide if there is a descending path between two points. They stated as open the problem of finding a shortest descending path (SDP). In a subsequent paper, Roy, Das and Nandy [11] consider some special cases; in particular, they give an  $O(n^2 \log n)$  time algorithm to compute an SDP in a convex or concave terrain, and an  $O(n \log n)$  time algorithm to compute an SDP through a sequence of parallel edges.

In this paper we first establish some properties of locally shortest descending paths, and show that they are much more complicated than geodesic paths. Then we turn to the case where the path must go through a given sequence of faces. We prove that the SDP is unique by proving that the length function is strictly convex. This approach was used by Mitchell and Papadimitriou [8] and Mitchell and Sharir [9] for respectively the weighted region problem and the shortest paths over parallel walls problem. Finally, we formulate the problem as a convex optimization problem and show that a  $(1 + \epsilon)$ -approximation of the path can be computed in  $O(n^{3.5} \log(\frac{1}{\epsilon}))$  time.

Our main long-term goal for the shortest descending path problem is to give an approximation algorithm that will find a shortest path even if the face sequence is not known. We will use an approach like that of Chen and Han [3] to decide which face sequence is best. We will use the uniqueness result for a given face sequence from the current paper, but we need significantly more. To be precise, our algorithm requires the ability to extend a locally shortest path. This is easy

\* Corresponding author.

E-mail addresses: m6ahmed@uwaterloo.ca (M. Ahmed), alubiw@uwaterloo.ca (A. Lubiw).

for geodesic paths because they unfold to straight lines, but for descending paths we need a significantly more detailed analysis of the bend angles. Although the convex optimization technique offered in the current paper is not part of our general solution, we think it is interesting in its own right.

## 2. Preliminaries

A terrain is a 2-dimensional surface in 3-dimensional space with the property that every line parallel to the  $z$ -axis intersects it in a point [5]. We assume that the terrain is triangulated. For any point  $p$  in the terrain,  $h(p)$  denotes the height of  $p$ , i.e., the  $z$ -coordinate of  $p$ .

A path  $P$  from  $s$  to  $t$  on the terrain is *descending* if the  $z$ -coordinate of a point  $p$  never increases while we move  $p$  along the path from  $s$  to  $t$ . A *shortest descending path* (SDP) from  $s$  to  $t$  is a descending path that is not longer than any other descending path from  $s$  to  $t$  in the terrain. A line segment of a descending path in face  $f$  is called a *free segment* if moving either of its endpoints by an arbitrarily small amount to a new position in  $f$  keeps the segment descending. Otherwise, the segment is called a *constrained segment*. All the points in a constrained segment are at the same height, though not all constant height segments are constrained. For example, a segment in a horizontal face is free, although all its points are at the same height. A path consisting solely of constrained segments is called a *constrained path*.

We will now define a *locally shortest descending path* (LSDP), which is analogous to a *geodesic path* (i.e., a *locally shortest path*) [7]. An LSDP between two nodes is a descending path that cannot be shortened by slight perturbation of the intermediate nodes. Note that perturbing a single node in a descending path may make the path infeasible (i.e., not descending), and hence, we allow more than one node to be perturbed simultaneously. For example, if we increase the height of a node  $p$  to  $H$ , all the points before  $p$  on the path must be moved to height at least  $H$  to keep the path descending. Also note that a constrained path is an LSDP.

Our uniqueness result relies on a certain function being strictly convex, which is defined as follows [2, Section 3.1.1]. A function  $f: \mathbb{R}^n \rightarrow \mathbb{R}$  is called *convex* if the domain of  $f$  is a convex set, and for all  $x, y$  in that domain and all  $c \in [0, 1]$ ,

$$f(cx + (1 - c)y) \leq cf(x) + (1 - c)f(y). \quad (1)$$

The function  $f$  is called *strictly convex* if strict inequality holds in Eq. (1) whenever  $x \neq y$  and  $0 < c < 1$ .

For ease of discussion, we will use the term “edge” to denote a line segment of the terrain, and the term “segment” to denote a line segment of a path. Similarly, an endpoint of an edge is called a “vertex”, while an endpoint of a segment is called a “node”. We assume that all paths in our discussion are directed. In our figures, a dashed line, which may contain an arrow to indicate the direction of ascent, denotes an edge, and a heavy arrow denotes a constrained segment.

## 3. Characteristics of an LSDP

An LSDP and a geodesic path over a terrain are similar in many respects. The following lemmas establish two properties of an LSDP that make an LSDP analogous to a geodesic path [7].

**Lemma 1.** Any subpath of an LSDP is an LSDP.

**Proof.** If a subpath  $P_1$  of an LSDP  $P$  is not locally shortest, there exists an LSDP  $P'_1$  corresponding to  $P_1$  such that the length of  $P'_1$  is less than that of  $P_1$ . In that case, we can modify  $P$  by replacing the subpath  $P_1$  with  $P'_1$  and get an LSDP of length less than that of  $P$ . This leads to a contradiction.  $\square$

**Lemma 2.** An LSDP consists of straight line segments, and bends only at the edges of the terrain.

**Proof.** Suppose that an LSDP  $P$  bends at point  $p$  that is an interior point of some face  $f$  of the terrain. Let  $P_1$  be the connected subpath of  $P \cap f$  that contains  $p$ , and  $p_1$  and  $p_2$  be respectively the starting and ending points of  $P_1$ . Since  $P$  is a descending path,  $h(p_1) \geq h(p_2)$ . Therefore, the line segment from  $p_1$  to  $p_2$  is a descending path, and its length is less

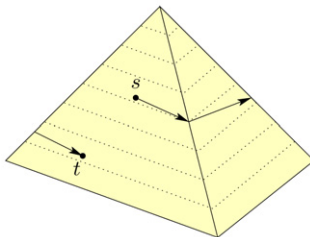

Fig. 1. An LSDP visiting a face twice.

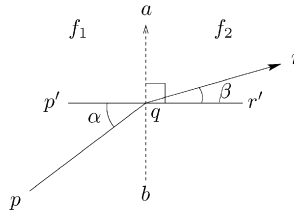

Fig. 2. Entering and exiting angles.

than that of  $P_1$  because  $P_1$  bends at  $p$ . That means,  $P_1$  is not an LSDP. Then, by Lemma 1,  $P$  is not an LSDP, which is a contradiction.  $\square$

As in the case of a geodesic path [7], an LSDP may visit a single face more than once. For example, a string tightly wrapped around a pyramid as shown in Fig. 1 is an LSDP from  $s$  to  $t$ , and it visits a face twice. However, like a shortest path, an SDP visits a face at most once:

**Lemma 3.** (See [11].) *The intersection of an SDP  $P$  with a face of the terrain is either empty or a line segment.*

One important difference between an LSDP and a geodesic path is that unlike a geodesic path [7], two consecutive segments of an LSDP through an edge  $ab$  do not always become a straight line segment when the two faces of the terrain adjacent to  $ab$  are unfolded onto a plane. Before proving this claim, we define two angles at every edge intersected by an LSDP to quantify the amount of deflection at that edge. Let  $P = (p, q, r)$  be a descending path from an interior point  $p$  in face  $f_1$  to an interior point  $r$  in face  $f_2$  adjacent to  $f_1$  such that  $P$  crosses edge  $ab = f_1 \cap f_2$  at  $q$  where  $h(a) \geq h(b)$  (Fig. 2). Unfold the two faces onto a common plane, and then let  $p'q$  be a line segment perpendicular to  $ab$  at  $q$  such that  $p' \in f_1$  and  $r' \in f_2$ . The angle  $\angle pqp'$  is called the *entering angle* of  $P$  at  $ab$ , and is considered positive if and only if  $p$  and  $b$  are on the same side of  $p'r'$ . The angle  $\angle rqr'$  is called the *exiting angle* of  $P$  at  $ab$ , and is considered positive if and only if  $r$  and  $a$  are on the same side of  $p'r'$ . In Fig. 2,  $\alpha$  and  $\beta$  are respectively the entering angle and the exiting angle of  $P$  at  $ab$ . When  $h(a) > h(b)$ , we say that  $P$  deflects downward at  $q$  if  $\alpha > \beta$ , and that  $P$  deflects upward at  $q$  if  $\alpha < \beta$ . Note that if  $h(a) = h(b)$ , entering and leaving angles can be defined in two ways. Our discussion is valid for any of these definitions.

**Lemma 4.** *The descending path  $P = (p, q, r)$  is an LSDP if and only if one of the following holds:*

- (i)  $\alpha = \beta$ ;
- (ii)  $\alpha > \beta$ , and  $qr$  is constrained; or
- (iii)  $\alpha < \beta$ , and  $pq$  is constrained.

**Proof.** ( $\Leftarrow$ )

- (i) If  $\alpha = \beta$ , then for any point  $q' \in ab$  such that  $q' \neq q$ , length of the path  $(p, q', r)$  is more than that of  $P$ . Therefore,  $P$  is an LSDP.
- (ii) If  $\alpha > \beta$ , and  $qr$  is constrained, then for any point  $q' \in ab$  such that  $h(q') > h(q)$ ,  $q$  lies inside the smaller angle made by  $pq'$  and  $q'r$  at  $q'$  (Fig. 3(a)). Clearly, the length of the path  $(p, q', r)$  is more than that of  $P$ . On the other hand, for any point  $q' \in ab$  such that  $h(q') < h(q)$ ,  $(p, q', r)$  is not a descending path because  $h(r) = h(q) > h(q')$ . Therefore,  $P$  is an LSDP.
- (iii) If  $\alpha < \beta$ , and  $pq$  is constrained, the proof is similar to the one for Case (ii), except that the path  $(p, q', r)$  is longer than  $P$  when  $h(q') < h(q)$ , and is infeasible when  $h(q') > h(q)$ .

( $\Rightarrow$ ) It is sufficient to show that if either  $\alpha < \beta$  and  $pq$  is free, or  $\alpha > \beta$  and  $qr$  is free,  $P$  is not an LSDP.

If  $\alpha < \beta$  and  $pq$  is free, let  $q'$  be a point on  $ab$  slightly above  $q$ , but with  $h(q') \leq h(p)$  (Fig. 3(b)). Such a point  $q'$  always exists because  $pq$  is a free segment and we can make  $q'$  arbitrarily close to  $q$ . We form a new path  $P' = (p, q', r)$ . Clearly,  $q'$  lies inside the smaller angle made by  $pq$  and  $qr$  at  $q$ , and hence, the length of  $P'$  is smaller than that of  $P$ . Because  $qr$  is descending, the segment  $q'r$  is also descending. The segment  $pq'$  is descending since  $h(q') \leq h(p)$ . Therefore,  $P'$  is a descending path, and is shorter than  $P$ . So,  $P$  is not an LSDP. We can similarly show that  $P$  is not an LSDP if  $\alpha > \beta$  and  $qr$  is free.  $\square$

Roy, Das and Nandy [11, Lemma 1] proved part of this lemma—in particular, for the case when the terrain is convex, in which case an SDP may bend upwards but not downwards. (Our preliminary version [1] misrepresented this aspect of their work, due to our misunderstanding.)

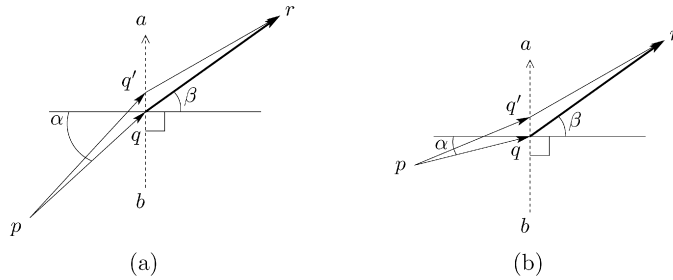

Fig. 3. Proof of Lemma 4.

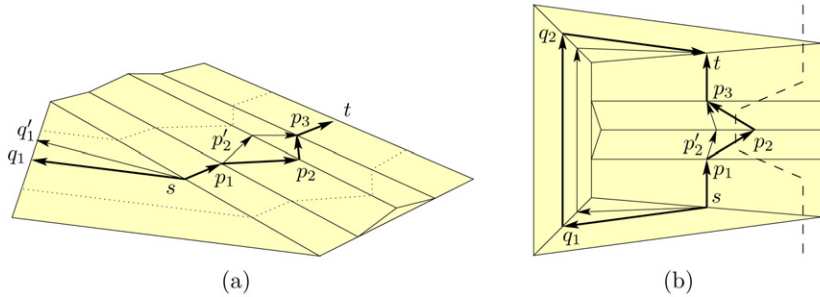

Fig. 4. Proof of Lemma 5.

In spite of all the similarities between an LSDP and a geodesic path, an SDP and a shortest path can be very different from each other. The following lemma proves this claim.

**Lemma 5.** Let  $P_T$  and  $P'_T$  denote respectively an SDP and a shortest path from  $s$  to  $t$  in terrain  $T$ . There exists a terrain  $T$  for which one (or more) of the following holds: (i) the ratio of the lengths of  $P_T$  and  $P'_T$  is arbitrarily large even when the paths pass through the same sequence of faces; (ii)  $P_T$  and  $P'_T$  pass through two different face sequences; and (iii) there is no descending path through the face sequence crossed by  $P'_T$ .

**Proof.** The idea is that a shortest path may climb over a ridge while the SDP may need to travel a long way around. We use a slightly more elaborate example to capture all the given situations. Consider a polyhedron that has a perspective view and a top view as in Fig. 4. The dotted lines in the perspective view are horizontal lines. Let  $s$  and  $t$  be two points of equal heights, and  $P$  be the constrained path  $(s, p_1, p_2, p_3, t)$ , as shown in the figure.

Let  $T_1$  be the terrain consisting of the faces crossed by  $P$ , and  $(s, p_1, p'_2, p_3, t)$  be the shortest path in  $T_1$ . Clearly,  $(s, p_1, p_2, p_3, t)$  is an SDP in  $T_1$ . Moreover,  $p_1p'_2 \perp p_2p'_2$  (and  $p_3p'_2 \perp p_2p'_2$  by symmetry). Now imagine rotating  $T_1$  around the axis defined by the line through  $s$  and  $t$ . This rotation keeps the length of  $(s, p_1, p'_2, p_3, t)$  unchanged, but changes the length of  $(s, p_1, p_2, p_3, t)$ . If we rotate  $T_1$  until the face adjacent to  $s$  becomes almost horizontal, the length of  $(s, p_1, p_2, p_3, t)$  becomes arbitrarily large. This proves the first part of the lemma.

Let  $T_2$  be the terrain consisting of the faces visible in the top view in Fig. 4. It is not hard to see that from  $s$  to  $t$  there are exactly two LSDPs  $(s, p_1, p_2, p_3, t)$  and  $(s, q_1, q_2, t)$ , and exactly two geodesic paths  $(s, p_1, p'_2, p_3, t)$  and  $(s, q'_1, q'_2, t)$  in  $T_2$ . In the figure, the path  $(s, p_1, p'_2, p_3, t)$  is shorter than the path  $(s, q'_1, q'_2, t)$ . So,  $(s, p_1, p'_2, p_3, t)$  is the shortest path from  $s$  to  $t$ . We can make the length of  $(s, p_1, p_2, p_3, t)$  greater than that of  $(s, q_1, q_2, t)$  by rotating the faces crossed by  $(s, p_1, p_2, p_3, t)$  as in the first part of the proof, while keeping the slopes of other faces unchanged. This makes  $(s, q_1, q_2, t)$  an SDP in  $T_2$ . Clearly, the SDP and the shortest path in  $T_2$  pass through disjoint sets of faces, which proves the second part.

If we modify  $T_2$  by removing the part of it to the right of the dashed lines in Fig. 4(b), it is no longer possible to construct any descending path through the face sequence crossed by the shortest path  $(s, p_1, p'_2, p_3, t)$ .  $\square$

Roy, Das and Nandy [11, Section 5] suggest a heuristic for tracing an approximate SDP  $P$  from  $s$  to  $t$ , which follows a shortest path  $P'$  until reaching a point where  $P'$  is not descending, and follows constrained segments from that point until the traced path  $P$  either reaches  $t$ , or reunites with  $P'$  in which case  $P$  starts following  $P'$  again. They point out in their conclusion that the efficacy of this method depends on whether there is any relationship between the length of an SDP and the length of a descending path through the face sequence of a shortest path. Lemma 5 answers this negatively. They also state as open the problem of finding an SDP through a given face sequence (for which they resort to a heuristic). We address this problem in the following sections.

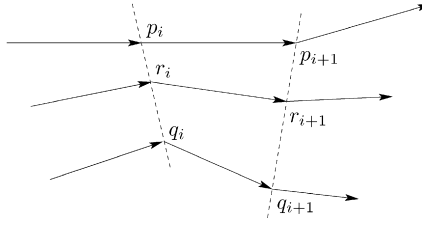

Fig. 5. Proving strict convexity of  $L(x_1, x_2, \dots, x_k)$ .

#### 4. Uniqueness of an LSDP

In this section, we show that LSDPs are unique by formulating the problem of computing an LSDP as a convex optimization problem. The uniqueness of a geodesic path is evident from the fact that an unfolded geodesic path is a straight line segment. Since an unfolded LSDP is not a straight line segment, the uniqueness of an LSDP is not obvious. In our proof below, we use  $\sigma_k = (f_0, f_1, \dots, f_k)$  to denote the given face sequence. We assume without loss of generality that source  $s$  is an interior point of  $f_0$ , destination  $t$  is an interior point of  $f_k$ , and for all  $i \in [1, k]$ , the edge between  $f_{i-1}$  and  $f_i$  is  $a_i b_i$  with  $h(a_i) \geq h(b_i)$ .

Let  $F(x_1, x_2, \dots, x_k)$  denote the general path consisting of the line segments  $sp_1, p_1 p_2, p_2 p_3, \dots, p_{k-1} p_k$  and  $p_k t$  in this order, where for all  $i \in [1, k]$ ,  $p_i$  is any point on the line through  $a_i b_i$ , and  $x_i$  is a parameter to denote the position of  $p_i$  on line  $a_i b_i$ . For all  $i \in [1, k]$  such that  $a_i b_i$  is non-horizontal, the height of  $p_i$  uniquely determines its position. So, in these cases, we use the height of  $p_i$  as parameter  $x_i$ . For each horizontal edge  $a_i b_i$ , we use as parameter  $x_i$  the signed distance of  $p_i$  from  $b_i$ . More precisely,  $x_i = \vec{b_i p_i} \cdot \vec{b_i a_i} / |a_i b_i|$  in this case.

Note that parameter  $x_i$  can be defined in many ways, and our results below remain unchanged when  $x_i$  varies linearly with the position of  $p_i$ . However, choosing the height of  $p_i$  as our parameter  $x_i$  for non-horizontal edges makes the proof of Lemma 7 very simple and intuitive, because the constraint that the path is descending is simply expressed as  $x_i \geq x_{i+1}$ . This is why we have chosen to define  $x_i$  in this manner.

Let  $L(x_1, x_2, \dots, x_k)$  denote the length of the path  $F(x_1, x_2, \dots, x_k)$ . In other words,  $L(x_1, x_2, \dots, x_k) = \sum_{i=0}^k |p_i p_{i+1}|$ , where  $p_0 = s$  and  $p_{k+1} = t$ . The core of our uniqueness proof is the following property of  $L(x_1, x_2, \dots, x_k)$ :

**Lemma 6.**  $L(x_1, x_2, \dots, x_k)$  is a strictly convex function.

A similar result was proved by Mitchell and Papadimitriou [8, Lemma 3.6] for the case of the weighted region problem. We include a proof for completeness and in order to be meticulous about faces where the function is convex but not strictly so.

**Proof.** Let  $(u_1, u_2, \dots, u_k)$  and  $(v_1, v_2, \dots, v_k)$  be two lists of constants such that  $u_i \neq v_i$  for at least one  $i \in [1, k]$ . For any real constant  $\kappa \in (0, 1)$ , let  $w_i = \kappa u_i + (1 - \kappa)v_i$  for all  $i \in [1, k]$ . We show that

$$L(w_1, w_2, \dots, w_k) < \kappa L(u_1, u_2, \dots, u_k) + (1 - \kappa)L(v_1, v_2, \dots, v_k),$$

which proves the lemma by the definition of strict convexity.

Clearly,  $F(u_1, u_2, \dots, u_k)$  and  $F(v_1, v_2, \dots, v_k)$  denote two different paths. Let the  $i$ th segments of the three paths  $F(u_1, u_2, \dots, u_k)$ ,  $F(v_1, v_2, \dots, v_k)$  and  $F(w_1, w_2, \dots, w_k)$  be  $p_i p_{i+1}$ ,  $q_i q_{i+1}$  and  $r_i r_{i+1}$  respectively (Fig. 5). We can express the coordinates of  $r_i$  in terms of those of  $p_i$  and  $q_i$  as follows:

$$r_i = \kappa p_i + (1 - \kappa)q_i.$$

Therefore,

$$\vec{r_i p_i} = p_i - r_i = p_i - \kappa p_i - (1 - \kappa)q_i = (1 - \kappa)(p_i - q_i) = (1 - \kappa)\vec{q_i p_i},$$

and similarly,  $\vec{r_i q_i} = \kappa \vec{p_i q_i}$ . So,  $\kappa \vec{r_i p_i} + (1 - \kappa)\vec{r_i q_i} = 0$ . For the same reason,  $\kappa \vec{p_{i+1} r_{i+1}} + (1 - \kappa)\vec{q_{i+1} r_{i+1}} = 0$ . Using these two equations, we can express  $\vec{r_i r_{i+1}}$  in terms of  $\vec{p_i p_{i+1}}$  and  $\vec{q_i q_{i+1}}$  as follows:

$$\begin{aligned} \vec{r_i r_{i+1}} &= \kappa \vec{r_i r_{i+1}} + (1 - \kappa)\vec{r_i r_{i+1}} \\ &= \kappa(\vec{r_i p_i} + \vec{p_i p_{i+1}} + \vec{p_{i+1} r_{i+1}}) + (1 - \kappa)(\vec{r_i q_i} + \vec{q_i q_{i+1}} + \vec{q_{i+1} r_{i+1}}) \\ &= \kappa \vec{p_i p_{i+1}} + (1 - \kappa)\vec{q_i q_{i+1}} + \kappa \vec{r_i p_i} + (1 - \kappa)\vec{r_i q_i} + \kappa \vec{p_{i+1} r_{i+1}} + (1 - \kappa)\vec{q_{i+1} r_{i+1}} \\ &= \kappa \vec{p_i p_{i+1}} + (1 - \kappa)\vec{q_i q_{i+1}}. \end{aligned}$$

Taking the lengths of  $\vec{r_i r_{i+1}}$ ,  $\vec{p_i p_{i+1}}$  and  $\vec{q_i q_{i+1}}$ , we get

$$|r_i r_{i+1}| \leq \kappa |p_i p_{i+1}| + (1 - \kappa) |q_i q_{i+1}|.$$

(2)

In Eq. (2), the equality holds only when  $p_i p_{i+1}$  and  $q_i q_{i+1}$  are parallel to each other. Because  $F(u_1, u_2, \dots, u_k)$  and  $F(v_1, v_2, \dots, v_k)$  are different paths, and they both start at  $s$  and end at  $t$ , there are at least two  $i \in [0, k]$  for which  $p_i p_{i+1}$  and  $q_i q_{i+1}$  are not parallel to each other. Considering this fact, and adding the lengths in Eq. (2) over all  $i \in [0, k]$ , we get:

$$\begin{aligned} \sum_{i=0}^k |r_i r_{i+1}| &< \kappa \sum_{i=0}^k |p_i p_{i+1}| + (1 - \kappa) \sum_{i=0}^k |q_i q_{i+1}| \\ \Rightarrow L(w_1, w_2, \dots, w_k) &< \kappa L(u_1, u_2, \dots, u_k) + (1 - \kappa) L(v_1, v_2, \dots, v_k), \end{aligned}$$

which completes the proof.  $\square$

We now determine the constraints on the variables  $x_i$ ,  $1 \leq i \leq k$ , that ensure that  $F(x_1, x_2, \dots, x_k)$  is a descending path through  $\sigma_k$ . For all  $i \in [1, k]$ , the following constraints ensure that the intermediate nodes of  $F(x_1, x_2, \dots, x_k)$  are not outside the corresponding edges:

$$h(b_i) \leq x_i \leq h(a_i), \quad \text{when } h(a_i) \neq h(b_i), \quad (3)$$

$$\text{and } 0 \leq x_i \leq |a_i b_i|, \quad \text{when } h(a_i) = h(b_i). \quad (4)$$

The constraints that ensure that  $F(x_1, x_2, \dots, x_k)$  is a descending path are:  $h(p_i) \geq h(p_{i+1})$  for all  $i \in [0, k]$ . For each  $i$  such that  $a_i b_i$  is horizontal,  $h(p_i)$  is a constant of value  $H_i = h(a_i)$ . Moreover,  $h(p_0)$  and  $h(p_k)$  are also constants of values  $H_0 = h(s)$  and  $H_{k+1} = h(t)$  respectively. For all other  $i \in [1, k]$ ,  $h(p_i) = x_i$ . Therefore, for every  $i \in [1, k]$ , the corresponding height constraint expressed in terms of variables  $x_i$ 's has one of the following forms:

$$x_i \geq x_{i+1}, \quad (5)$$

$$H_i \geq x_{i+1}, \quad (6)$$

$$x_i \geq H_{i+1}, \quad (7)$$

$$H_i \geq H_{i+1}. \quad (8)$$

Note that the constraint in Eq. (8) is either always satisfied, or never satisfied. Clearly, the constraint is redundant in the former case, and there is no descending path through  $\sigma_k$  from  $s$  to  $t$  in the latter case.

**Lemma 7.** *There is at most one LSDP through  $\sigma_k$  from  $s$  to  $t$ .*

**Proof.** Any LSDP through  $\sigma_k$  from  $s$  to  $t$  is an instance of  $F(x_1, x_2, \dots, x_k)$  because an LSDP bends only on the edges of the terrain (Lemma 2). Moreover, the length of an LSDP through  $\sigma_k$  from  $s$  to  $t$  corresponds to a local minimum of the length of  $F(x_1, x_2, \dots, x_k)$  subject to the constraints in Eqs. (3) to (8), i.e., a local minimum of  $L(x_1, x_2, \dots, x_k)$  subject to those constraints. Now observe that the constraints in Eqs. (3) to (8) are linear, and therefore, the domain defined by them is convex. Since  $L(x_1, x_2, \dots, x_k)$  is a strictly convex function (Lemma 6), it has at most one local minimum in the convex domain defined by those constraints [2, Section 4.2.1]. Therefore, there is at most one LSDP through  $\sigma_k$  from  $s$  to  $t$ .  $\square$

## 5. Algorithm

It follows from Lemma 7 that we can determine an SDP through  $\sigma_k$  from  $s$  to  $t$  by solving the following convex optimization problem:

$$\begin{aligned} \text{minimize} \quad & L(x_1, x_2, \dots, x_k) = \sum_{i=0}^k |p_i p_{i+1}| \\ \text{subject to} \quad & \text{the constraints in Eqs. (3) to (8).} \end{aligned}$$

We can use any method of solving a convex optimization problem to compute the SDP. Using the method used by Polishchuk and Mitchell [10], we get the following running-time:

**Theorem 8.** *Determining a  $(1 + \epsilon)$ -approximate SDP through a sequence of  $k$  faces from  $s$  to  $t$  takes  $O(k^{3.5} \log(\frac{1}{\epsilon}))$  time.*

**Proof.** We first convert the above convex optimization problem into the following equivalent problem on variables  $x_1, x_2, \dots, x_k, t_0, t_1, t_2, \dots, t_k$ :

$$\begin{aligned}
& \text{minimize} && \sum_{i=0}^k t_i \\
& \text{subject to} && |p_i p_{i+1}| \leq t_i, \quad \text{for } i \in [0, k], \\
& && \text{and} \\
& && \text{the constraints in Eqs. (3) to (8).}
\end{aligned} \tag{9}$$

It is easy to show that the coordinates of  $p_i$  vary linearly with  $x_i$  for all  $i \in [1, k]$ . As a result, the constraint in Eq. (9) can be written in the form  $|A_i x_i + B_i x_{i+1} + C_i| \leq t_i$  for some scalar constants  $A_i$ ,  $B_i$  and  $C_i$  for all  $i \in [0, k]$ . This makes the above optimization problem a Second-order Cone Program, for which finding an  $(1 + \epsilon)$ -approximate solution takes  $O(k^{3.5} \log(\frac{1}{\epsilon}))$  time [6].  $\square$

## References

- [1] Mustaq Ahmed, Anna Lubiw, Shortest descending paths through given faces, in: Proceedings of the 18th Canadian Conference on Computational Geometry, August 2006, pp. 35–38.
- [2] Stephen Boyd, Lieven Vandenbergh, Convex Optimization, Cambridge University Press, Cambridge, UK, 2004.
- [3] Jindong Chen, Yijie Han, Shortest paths on a polyhedron. I. Computing shortest paths, Internat. J. Comput. Geom. Appl. 6 (2) (1996) 127–144.
- [4] Mark de Berg, Marc J. van Kreveld, Trekking in the Alps without freezing or getting tired, Algorithmica 18 (3) (1997) 306–323.
- [5] Mark de Berg, Marc J. van Kreveld, Mark Overmars, Otfried Schwarzkopf, Computational Geometry: Algorithms and Applications, 2nd edition, Springer-Verlag, Berlin, 2000.
- [6] Miguel S. Lobo, Lieven Vandenbergh, Stephen Boyd, Hervé Lebret, Applications of second-order cone programming, Linear Algebra Appl. 284 (1998) 193–228.
- [7] Joseph S.B. Mitchell, David M. Mount, Christos H. Papadimitriou, The discrete geodesic problem, SIAM J. Comput. 16 (4) (1987) 647–668.
- [8] Joseph S.B. Mitchell, Christos H. Papadimitriou, The weighted region problem: finding shortest paths through a weighted planar subdivision, J. ACM 38 (1) (1991) 18–73.
- [9] Joseph S.B. Mitchell, Micha Sharir, New results on shortest paths in three dimensions, in: Proceedings of the 20th Annual Symposium on Computational Geometry, ACM Press, New York, 2004, pp. 124–133.
- [10] Valentin Polishchuk, Joseph S.B. Mitchell, Touring convex bodies—a conic programming solution, in: Proceedings of the 17th Canadian Conference on Computational Geometry, 2005, pp. 290–293.
- [11] Sasanka Roy, Sandip Das, Subhas C. Nandy, Shortest monotone descent path problem in polyhedral terrain, in: Proceedings of the 22nd Annual Symposium on Theoretical Aspects of Computer Science, in: Lecture Notes in Computer Science, vol. 3404, Springer-Verlag, Berlin, 2005, pp. 281–292.
